# Supplementary material for: Hollow calcite crystals with complex morphologies formed from amorphous precursors and regulated by surfactant micellar structures
Source: Royal Society of Chemistry journal article supplement (doi:10.1039/c003839c), 2010-01-01
Supplement: c003839c.pdf [file c003839c.pdf]

# Hollow Calcite Crystals with Complex Morphologies Formed from Amorphous Precursors and Regulated by Surfactant Micellar Structures

Department of Chemistry, William Mong Institute of Nano Science and Technology, The Hong Kong University of Science and Technology, Clear Water Bay, Kowloon, Hong Kong

Junwu Xiao, Shihe Yang\* (E-mail: [chsyang@ust.hk](mailto:chsyang@ust.hk))

## Electronic Supplementary Information

**Figure SI-1.** (A) SEM image of a sample obtained after 9 h of reaction in the presence of 10 mM CTAB; (B) SEM image of broken rod shaped crystals obtained after 9 h of reaction in the presence of 277 mM CTAB; (C) XRD pattern of a sample collected after 9 h of reaction in the presence of 100 mM CTAB, in accord with the standard pattern of calcite (JCPDS: 47-1743); (D) SEM image of a sample obtained after 9 h of reaction in the absence of CTAB.

**Figure SI-2.** (A) Photograph showing a laser beam path through the mother solution obtained after 4.5 h of reaction in  $\text{NH}_4\text{HCO}_3$  atmosphere (h: height of the solution in a quartz cell); (B) EDX spectrum of the particles formed after 4.5 h of reaction in the atmosphere of  $\text{NH}_4\text{HCO}_3$ .

**Figure SI-3.** The pH drift assay vs. the reaction time at various CTAB concentrations.

**Figure SI-4.** High magnification SEM images: (A, B) Aggregated spherical particles and radiating cluster shaped branches in the presence of 1 mM CTAB after 2 h of reaction, corresponding to Figure 4B. (C) Radiating cluster shaped branches formed in the presence of 5 mM CTAB after 2 h of reaction, corresponding to Figure 4F. (D) Radiating cluster shaped branches formed in the presence of 10 mM CTAB after 2 h of reaction, corresponding to Figure 4J. (E, F) Spherical particles as the core and the radiating spiciform shaped branches obtained in the presence of 100 mM CTAB after 2 h of reaction, corresponding to Figure 4N.

**Figure SI-5.** SEM image of a sample formed after 9 h of reaction in the presence of 10 mM CTAB (A: larger single crystals; B: smaller nanocrystals).

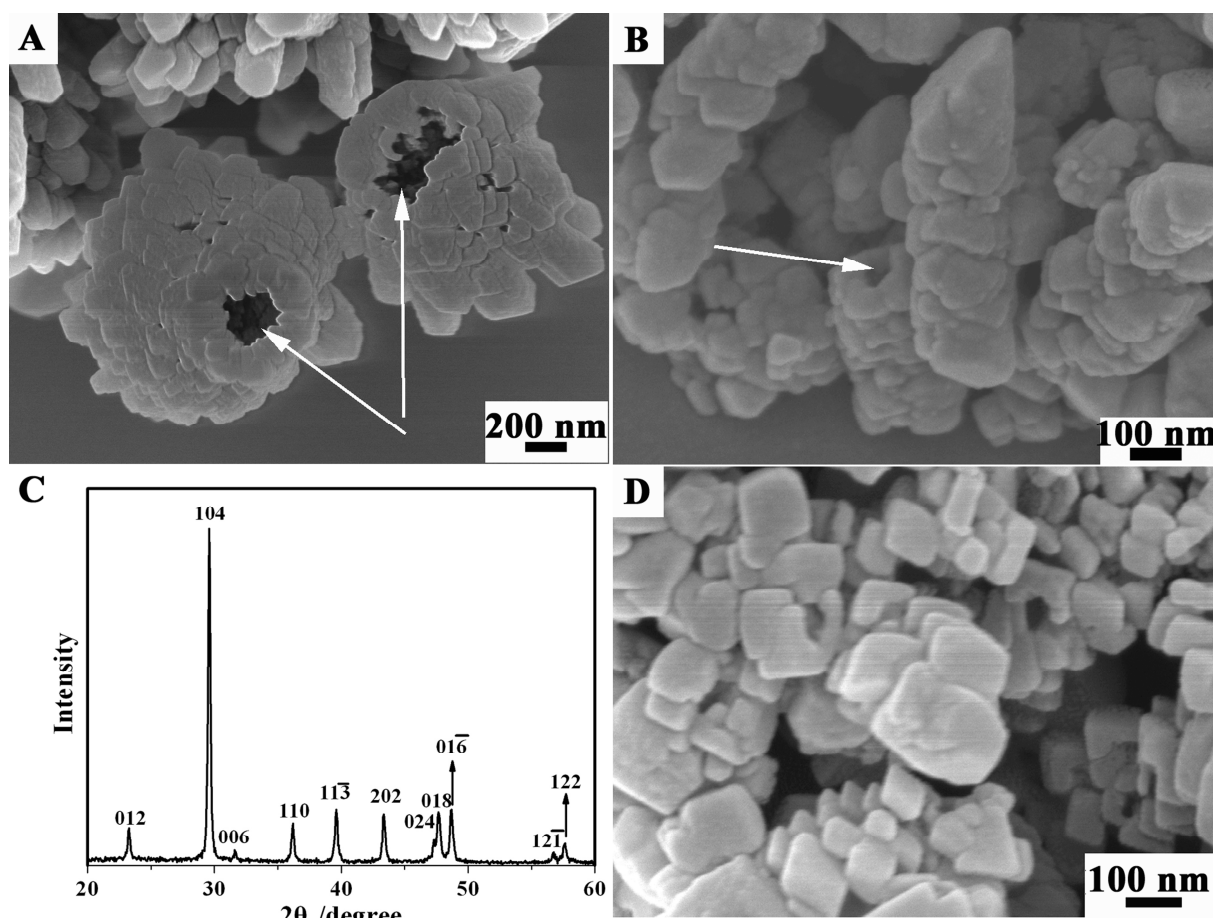

Figure SI-1

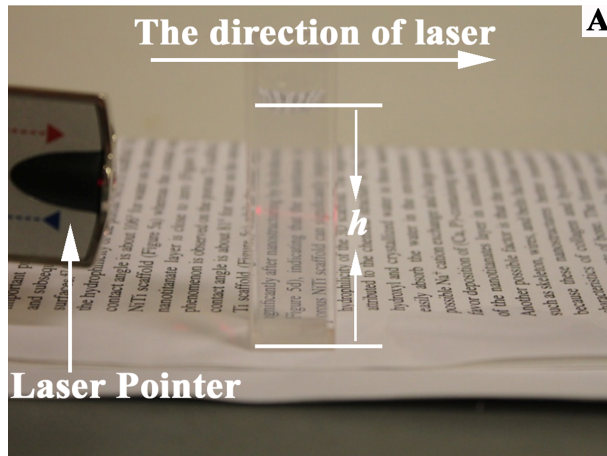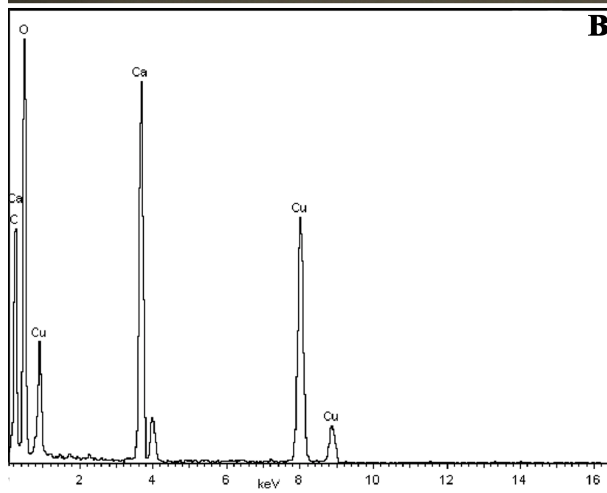

**Figure SI-2**

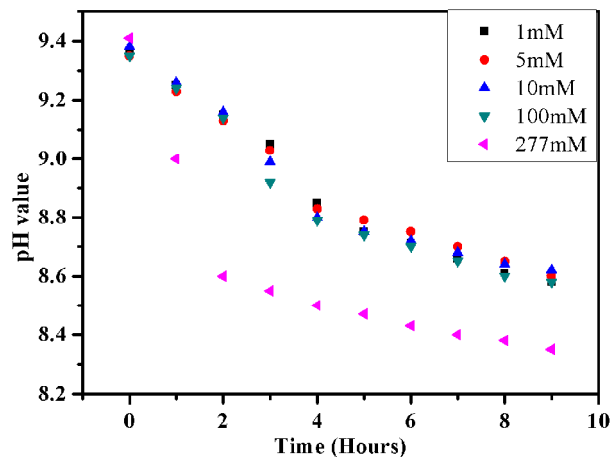

**Figure SI-3**



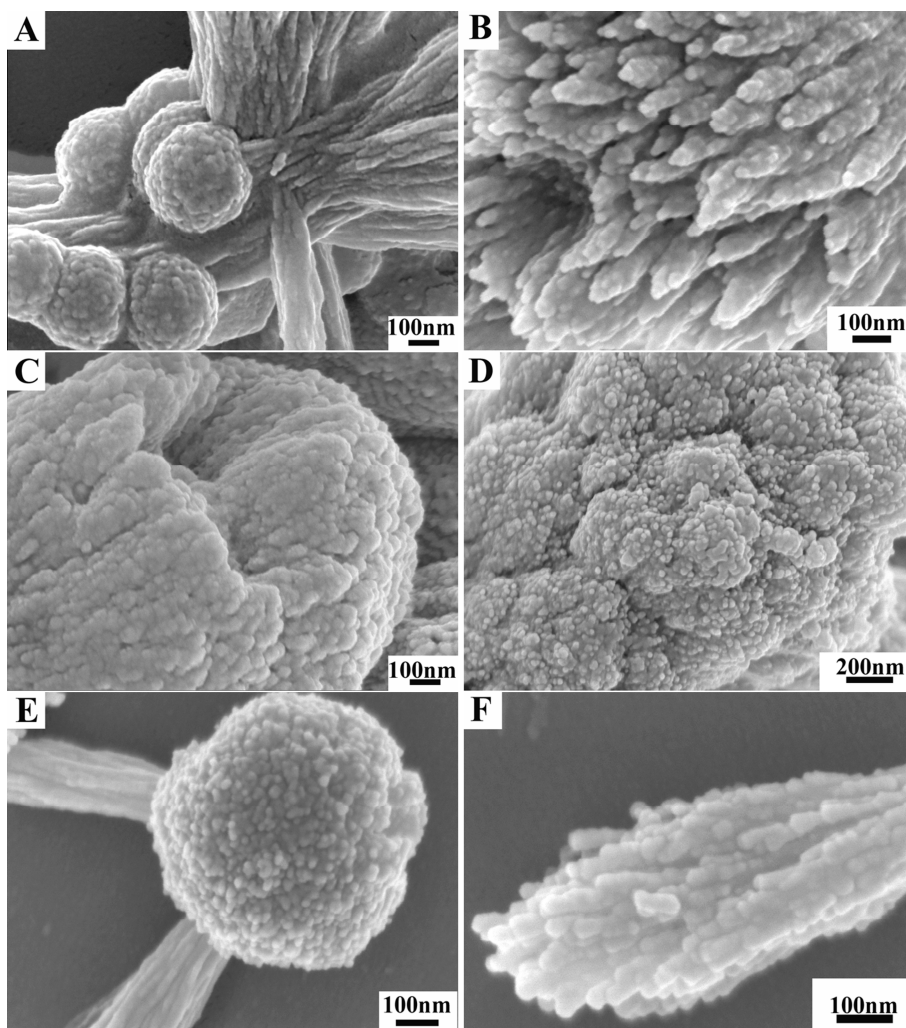

**Figure SI-4**

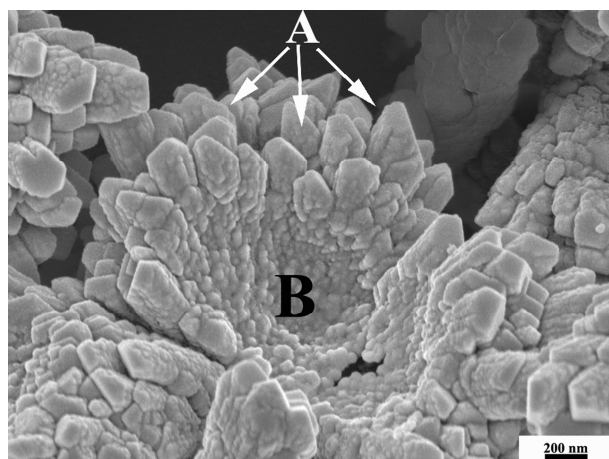

**Figure SI-5**
